# Supplementary material
Source: PubMed Central journal article supplement (PMC4172465)
Supplement: Supp_Fig2.pdf [file Supp_Fig2.pdf]

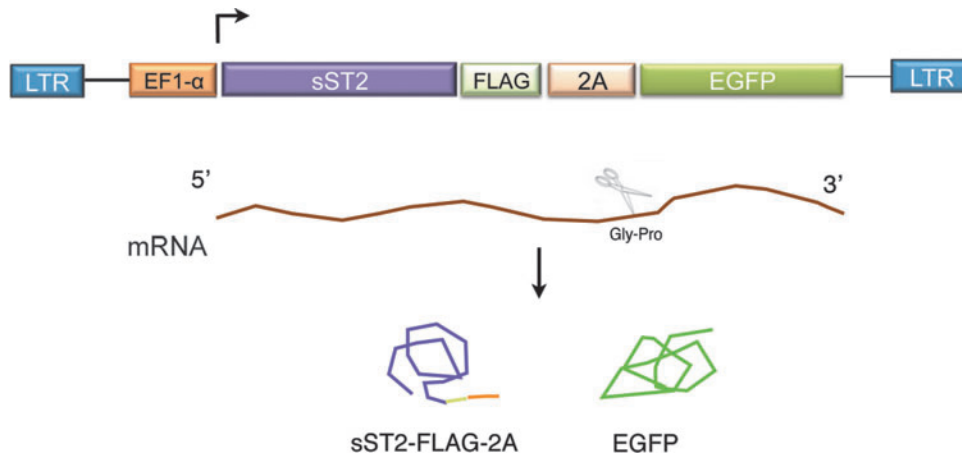

**SUPPLEMENTARY FIG. S2.** Proviral configuration of the bicistronic lentiviral vector employed to genetically engineer hASCs. The human elongation factor 1 alpha (EF1 $\alpha$ ) promoter transcribes a unique mRNA encoding, in a 5' to 3' orientation, the C-terminus FLAG-tagged murine sST2 cDNA, followed by the teschovirus-derived 2A peptide sequence, and the reporter EGFP cDNA. Independent cotranslated sST2-FLAG and EGFP proteins are generated by ribosome "skipping" of the Gly-Pro peptide bond within the 2A sequence.
