# Supplementary material
Source: PubMed Central journal article supplement (PMC4172465)
Supplement: Supp_Fig3.pdf [file Supp_Fig3.pdf]

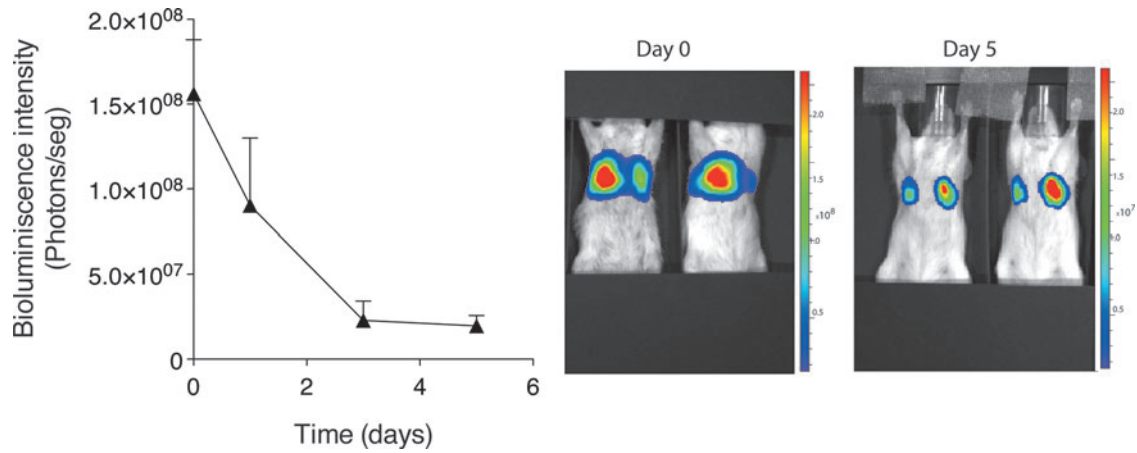

**SUPPLEMENTARY FIG. S3.** Bioluminescence imaging of hASC clearance from mouse lungs after intravenous infusion. In vivo bioluminescence imaging follow-up of LV-T2A-transduced hASCs ( $1 \times 10^6$  cells/mouse;  $n=4$ ) retained into the lung after tail vein administration. Decreased photon counts recorded versus elapsed time post-hASC inoculation reflected the decay of fLuc activity and, hence, hASC clearance. Pseudo-color composite images represent ranges of light-intensity levels as a consequence of fLuc activity from two representative mice at the indicated times after hASC administration. In each image, note the different color bars and numbers illustrating relative light intensities from the lowest (*blue*) to the highest (*red*).
