# Supplementary material
Source: PubMed Central journal article supplement (PMC4172465)
Supplement: Supp_Fig4.pdf [file Supp_Fig4.pdf]

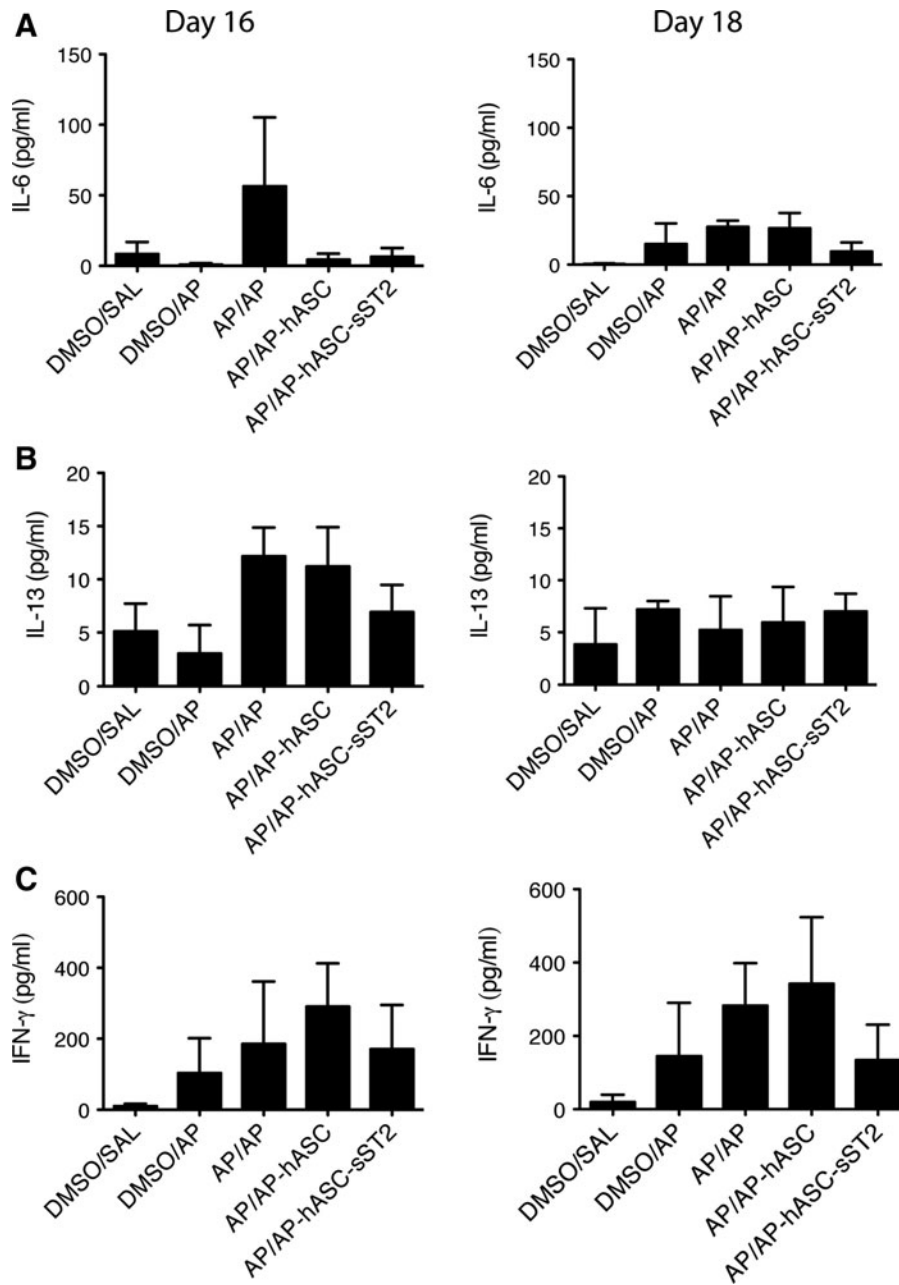

**SUPPLEMENTARY FIG. S4.** Inflammatory cytokines in the lung airspace of AP-challenged mice. Levels of inflammatory cytokines IL-6 (A), IL-13 (B), and  $\gamma$ -IFN (C) were measured in the BALFs by multiplex ELISA at 16 and 18 days after the initial AP sensitization step. Experimental groups are DMSO/SAL–PBS, DMSO/AP–PBS, AP/AP–PBS, AP/AP–hASC, and AP/AP–hASC-sST2. Values are means  $\pm$  SDs ( $n = 3$ –5 mice per group). DMSO, dimethylsulfoxide; SAL, saline; PBS, phosphate-buffered saline; AP, ammonium persulfate; hASC, hASCs overexpressing EGFP; hASC-sST2, hASCs overexpressing sST2 and EGFP. For all cytokines,  $P > 0.05$  compared with the AP/AP–PBS group.
